# Supplementary material for: Immunopathogenesis and pathological features of NADC34-like PRRSV infection in pregnant sows during late gestation
Source: Research Square preprint supplement (doi:10.21203/rs.3.rs-8330222/v1), 2026-01-20
Supplement: Supplementary file 1 [file 0abbc353b8b6d5c8b778b7ac.pdf]

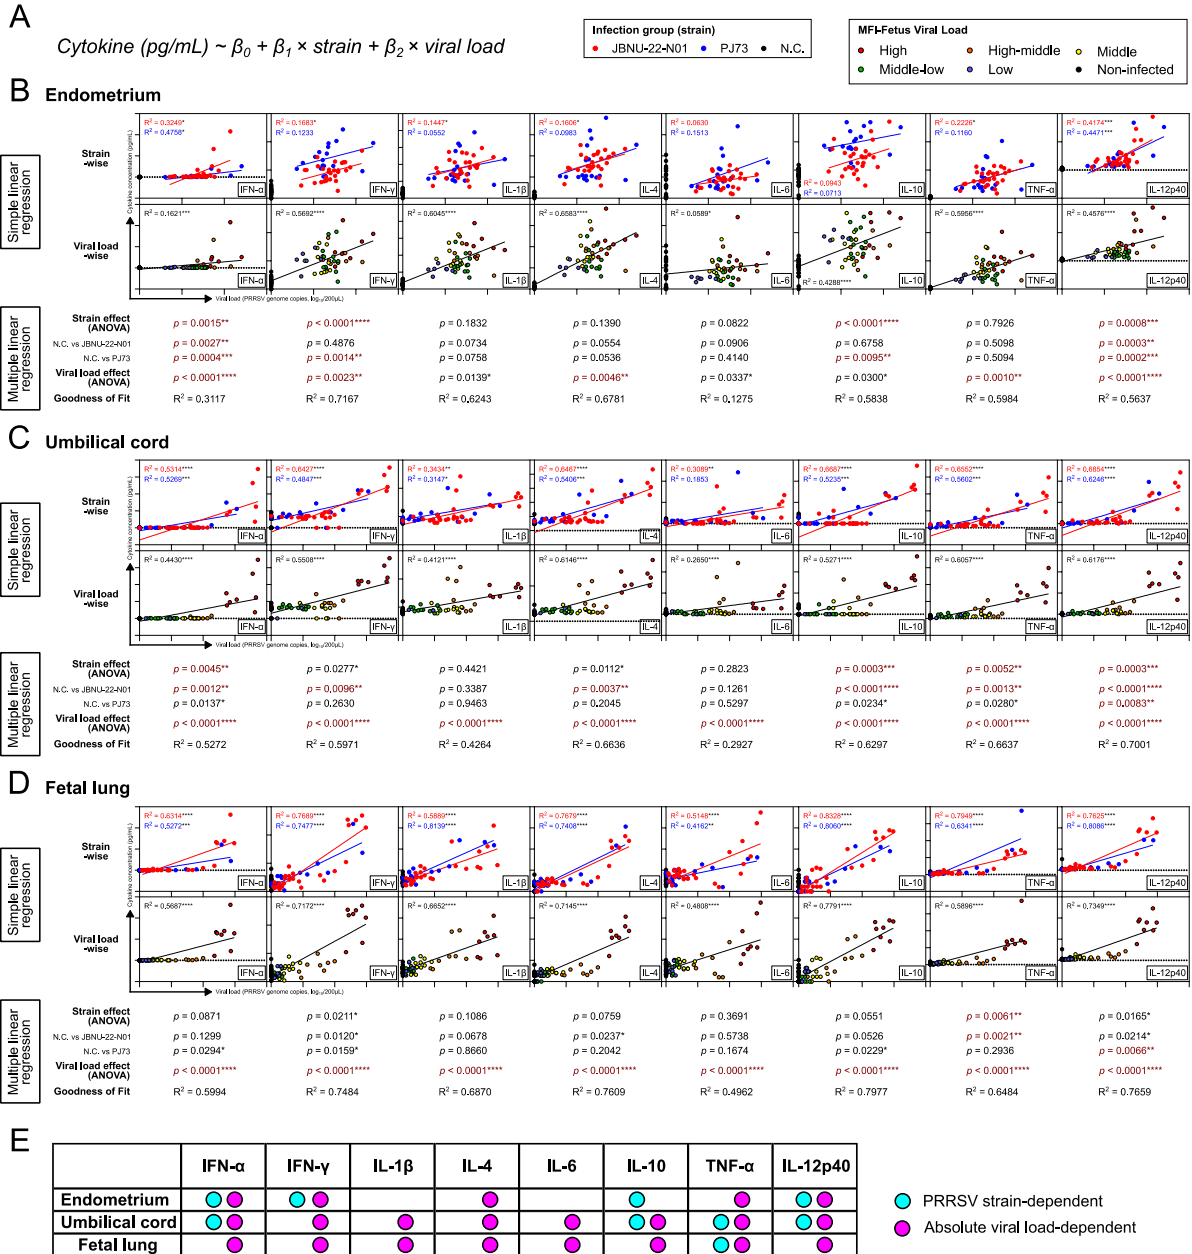

**Additional file 5. Quantitative regression analysis of PRRSV strain and viral load effects on endometrial gene expression.** (A) Multiple linear regression (MLR) model used to assess the independent effects of PRRSV strain and viral load on gene expression levels, formulated as: Gene expression (log2 fold change,  $-\Delta\Delta Ct$ ) =  $\beta_0 + \beta_1 \times \text{strain} + \beta_2 \times \text{viral load}$ . (B–C) Summary of regression analyses for gene expression levels measured in the endometrium. (B) Cell junction-related genes, including tight junction-associated genes (CLDN1, CLDN4, CLDN5, CLDN6, CLDN10, TJP1) and adherens junction components (CDH1, CXADR). (C) Immune-related genes, including immune checkpoint molecules (PD1, PDL1), interferon-stimulated genes (ISG15, ISG12[A]), and macrophage markers (TREM2, SPP1). For each gene, simple linear regression analyses were performed to examine the correlation between gene expression levels and viral loads, stratified by strain group (strain-wise) and viral load category (viral load-wise), with R-squared values indicating the strength of association. In addition, MLR outcomes for each gene are presented, including the statistical significance of strain and viral load effects and model goodness-of-fit. (D) Summary of classification of gene expression patterns as strain-

dependent or absolute viral load-dependent, based on the MLR analyses. Genes were designated as strain-dependent when the strain effect was significant at  $p < 0.01$ , and as absolute viral load-dependent when the viral load effect was significant at  $p < 0.01$ .
