# Supplementary material for: Immunopathogenesis and pathological features of NADC34-like PRRSV infection in pregnant sows during late gestation
Source: Research Square preprint supplement (doi:10.21203/rs.3.rs-8330222/v1), 2026-01-20
Supplement: Supplementary file 3 [file 57f641b2dd1dfd116f0f0680.pdf]

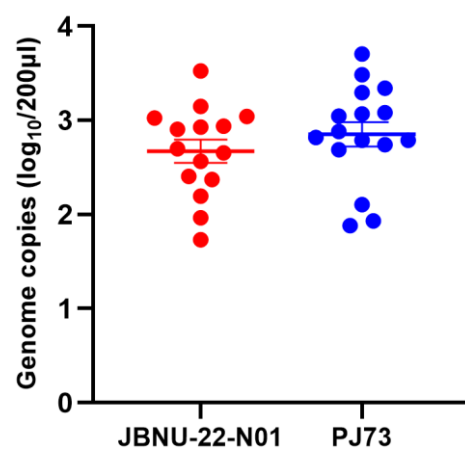

**Additional file 2. PRRSV genomic RNA levels in pleural effusion of aborted fetuses at parturition.** Data represent individual fetuses per group
