# Supplementary material for: Immunopathogenesis and pathological features of NADC34-like PRRSV infection in pregnant sows during late gestation
Source: Research Square preprint supplement (doi:10.21203/rs.3.rs-8330222/v1), 2026-01-20
Supplement: Supplementary file 4 [file 738ffea05c8673e73dc1cb13.pdf]

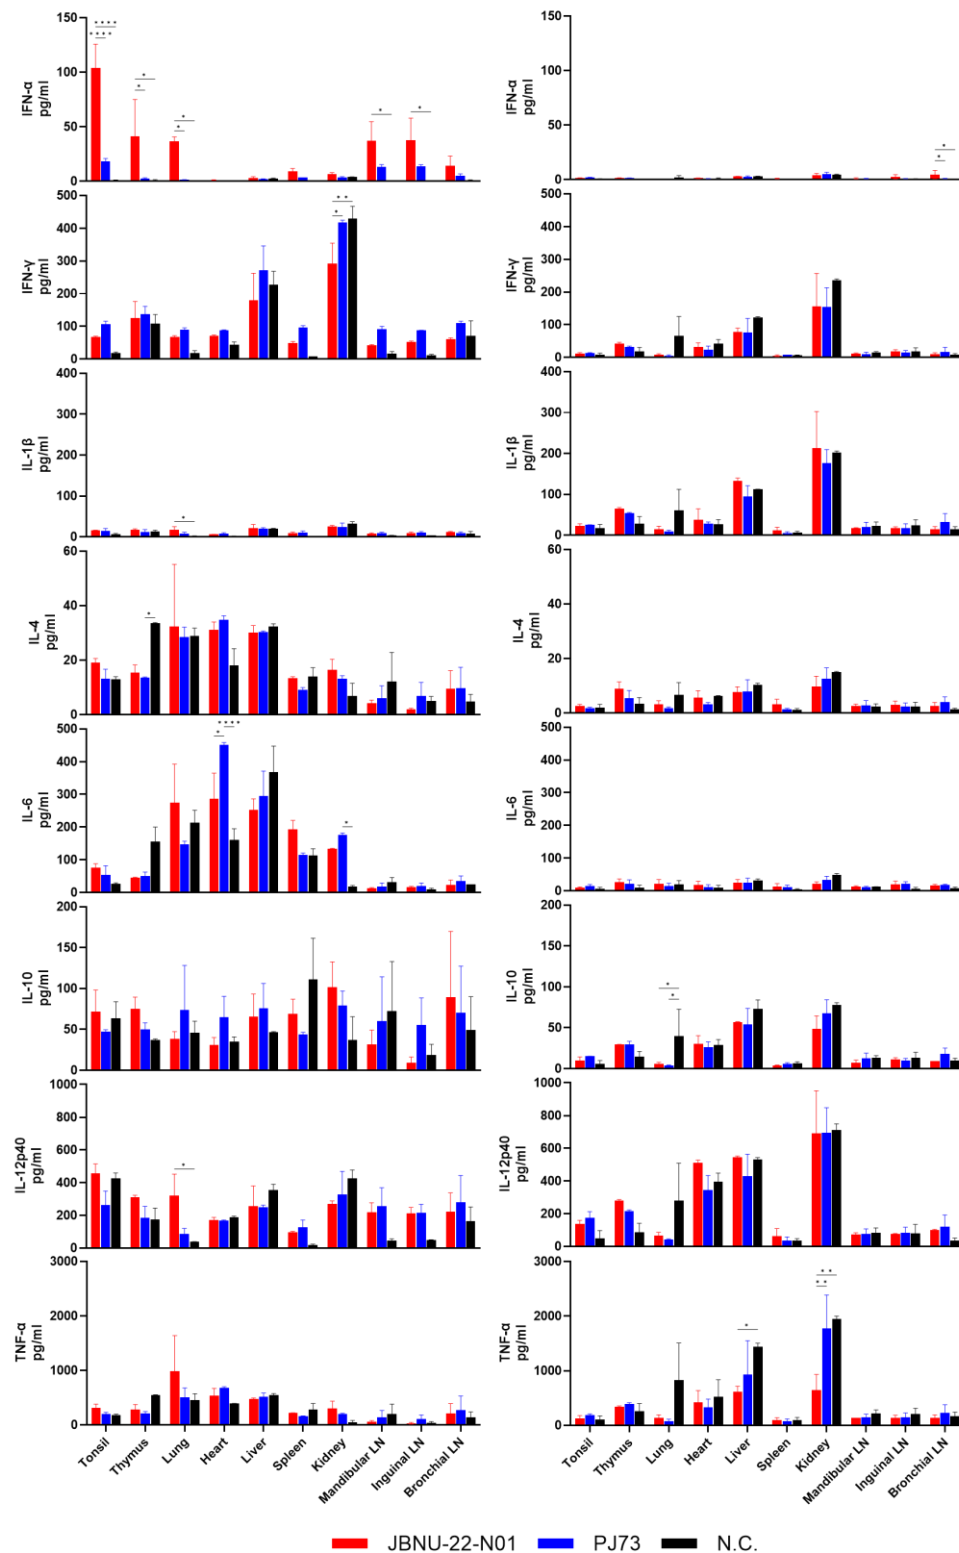

**Additional file 3. Tissue-specific comparison of cytokine levels in maternal tissues of PRRSV-infected sows.** Data are presented as mean  $\pm$  SEM. Statistical analysis was performed using two-way ANOVA with Tukey's multiple comparisons test. Statistical significance: \* $p < 0.05$ , \*\* $p < 0.01$ , \*\*\* $p < 0.001$ , \*\*\*\* $p < 0.0001$ .
