# Supplementary material for: Immunopathogenesis and pathological features of NADC34-like PRRSV infection in pregnant sows during late gestation
Source: Research Square preprint supplement (doi:10.21203/rs.3.rs-8330222/v1), 2026-01-20
Supplement: Supplementary file 5 [file 80adae74c911690d04cff0a7.pdf]

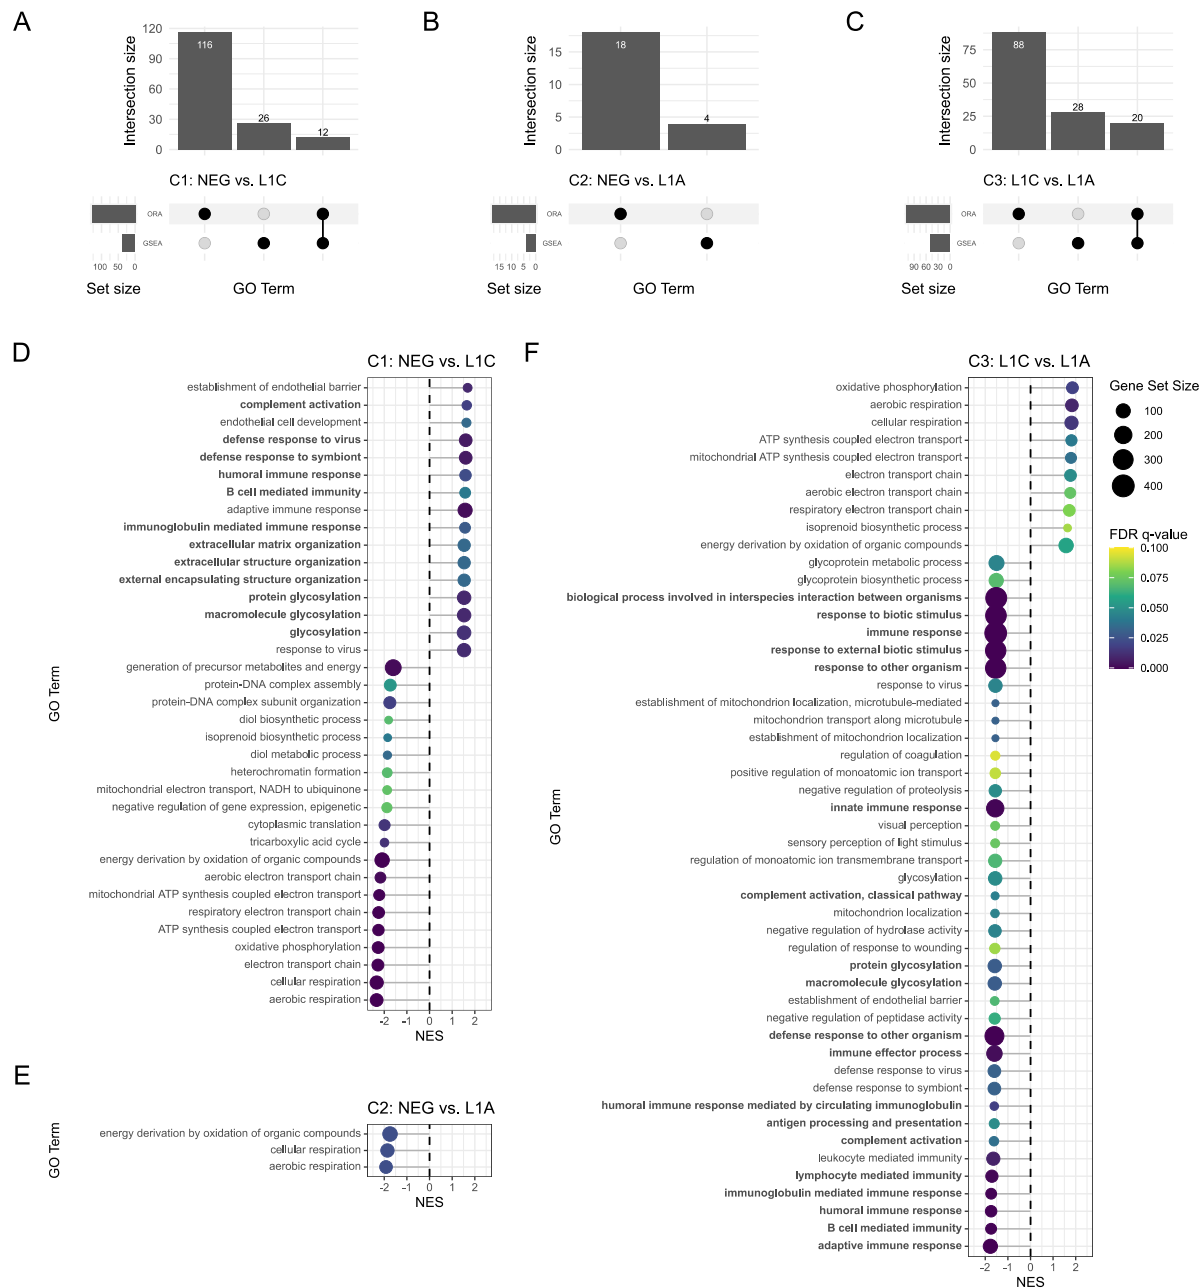

**Additional file 7. GO term enrichment analysis.** (A–C) UpSet plots showing overlap between Gene Ontology (GO) terms enriched by over-representation analysis (ORA) and gene set enrichment analysis (GSEA) for each comparison. (D–F) Dot plots of GSEA-enriched biological process (BP) GO terms: (D) NEG vs. L1C\_MVL (C1), (E) NEG vs. L1A\_MVL (C2), and (F) L1C\_MVL vs. L1A\_MVL (C3).
