# Supplementary material for: Immunopathogenesis and pathological features of NADC34-like PRRSV infection in pregnant sows during late gestation
Source: Research Square preprint supplement (doi:10.21203/rs.3.rs-8330222/v1), 2026-01-20
Supplement: Supplementary file 7 [file ffc905d2962df7fa01c1a654.pdf]

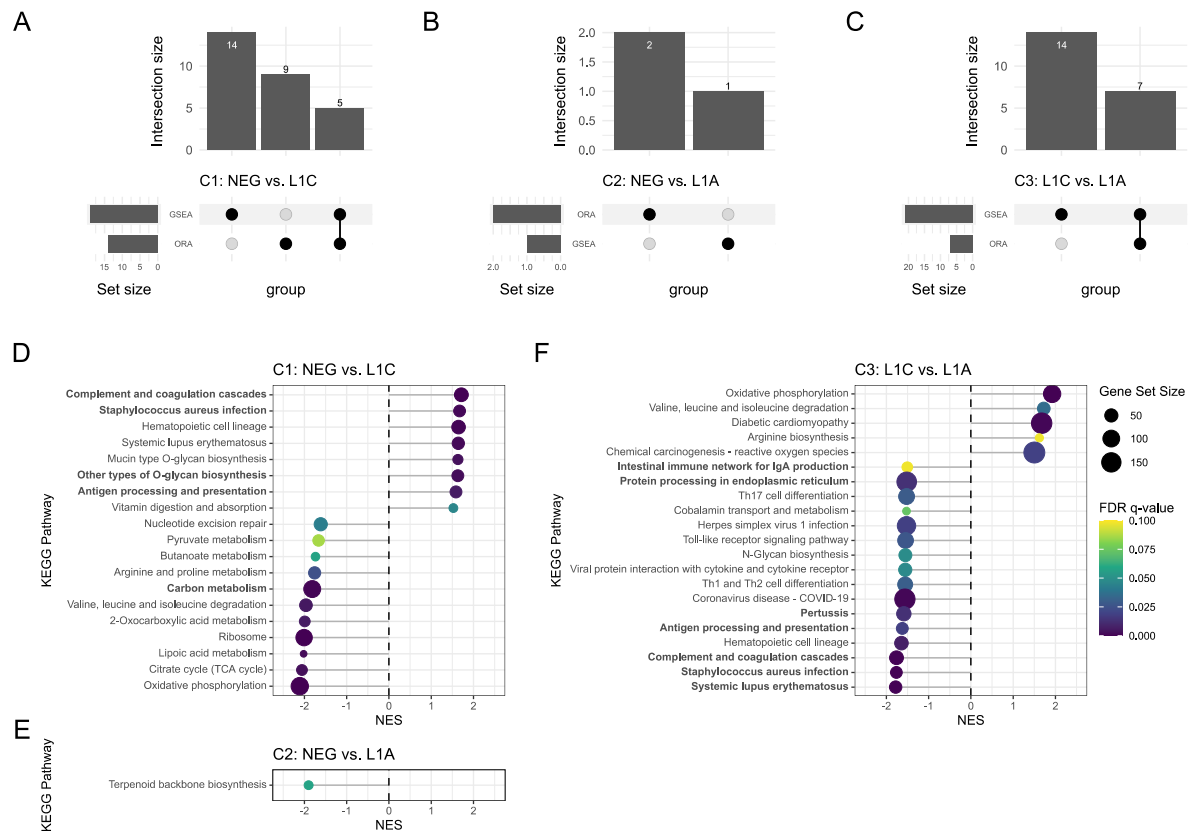

**Additional file 8. KEGG pathway enrichment analysis.** (A–C) UpSet plots showing overlap between ORA and GSEA results for KEGG pathways across three comparisons. (D–F) Dot plots representing GSEA-enriched KEGG pathways: (D) NEG vs. L1C\_MVL (C1), (E) NEG vs. L1A\_MVL (C2), and (F) L1C\_MVL vs. L1A\_MVL (C3). Immune-related pathways are strongly enriched in L1C\_MVL samples. (G) Network representation of GSEA-enriched KEGG pathways based on semantic similarity clustering.
